# Supplementary material
Source: bioRxiv or medRxiv preprint supplement (https://www.biorxiv.org/highwire/filestream/116164/field_highwire_adjunct_files/0/381210-1.pdf)
Supplement: Supplementary file [file 381210-1.pdf]

## Electronic Supplementary Materials (ESM)

**Table S1.** Learned colour preferences of bumblebees after absolute conditioning to various colour patterns, differing in spatial arrangement of blue and/or yellow colour segments. Bees were trained to collect sucrose from the centre of their rewarded training pattern, and after ten trials were tested for a learned colour preference during three-minute tests with unrewarded bicoloured patterns. A colour preference is evinced by a significant difference in time spent searching one colour-half versus the other: ‘search time’ is the total time the bee spent visually exploring the test pattern within a distance of 5cm, excluding time spent landed/walking on the target.

| Rewarded training pattern | N  | Test pattern | Mean time (s) searching each colour $\pm$ S.E. |                  | Paired test                    | Colour preference |
|---------------------------|----|--------------|------------------------------------------------|------------------|--------------------------------|-------------------|
|                           |    |              | Blue half                                      | Yellow half      |                                |                   |
| Yellow                    | 10 | Blue/Yellow  | 6.5 $\pm$ 1.2                                  | 31.5 $\pm$ 7.51  | Z=-2.803, p=0.005              | Yellow            |
|                           |    | Yellow/Blue  | 8.4 $\pm$ 2.17                                 | 18.2 $\pm$ 3.53  | t <sub>9</sub> =-3.83, p=0.004 | Yellow            |
| Blue                      | 10 | Blue/Yellow  | 25.0 $\pm$ 4.99                                | 3.9 $\pm$ 0.81   | t <sub>9</sub> =4.9, p=0.001   | Blue              |
|                           |    | Yellow/Blue  | 28.0 $\pm$ 2.68                                | 9.1 $\pm$ 1.46   | Z=-2.803, p=0.005              | Blue              |
| Blue/Yellow               | 11 | 90           | 7.6 $\pm$ 1.32                                 | 18.8 $\pm$ 2.01  | Z=-2.803, p=0.005              | Yellow            |
|                           |    | 270          | 6.9 $\pm$ 1.56                                 | 16.3 $\pm$ 2.89  | t <sub>9</sub> =-5.41, p<0.001 | Yellow            |
|                           |    | 180          | 9.5 $\pm$ 2.13                                 | 17.8 $\pm$ 3.9   | Z=-2.09, p=0.037               | Yellow            |
| Yellow/Blue               | 12 | 90           | 20.1 $\pm$ 3.23                                | 7.1 $\pm$ 1.18   | t <sub>11</sub> =4.91, p<0.001 | Blue              |
|                           |    | 270          | 21.3 $\pm$ 2.95                                | 8.3 $\pm$ 1.42   | t <sub>11</sub> =6.97, p<0.001 | Blue              |
|                           |    | 180          | 19.2 $\pm$ 4.83                                | 8.4 $\pm$ 1.31   | Z=-2.28, p=0.023               | Blue              |
| 3Y:1B                     | 10 | 90           | 17.3 $\pm$ 3.53                                | 19.6 $\pm$ 3.75  | t <sub>8</sub> =-1.07, p>0.05  | No                |
|                           |    | Blue/Yellow  | 9.1 $\pm$ 2.35                                 | 14.4 $\pm$ 2.81  | t <sub>9</sub> =-1.84, p>0.05  | No                |
|                           |    | Yellow/Blue  | 8.6 $\pm$ 7.74                                 | 18.6 $\pm$ 11.74 | Z=-1.78, p>0.05                | No                |
| 1B:3Y                     | 10 | 90           | 7.2 $\pm$ 1.66                                 | 20.2 $\pm$ 2.66  | t <sub>9</sub> =-8.71, p<0.001 | Yellow            |
|                           |    | Blue/Yellow  | 4.53 $\pm$ 0.99                                | 15.42 $\pm$ 3.29 | t <sub>9</sub> =-4.52, p=0.001 | Yellow            |
|                           |    | Yellow/Blue  | 6.6 $\pm$ 1.6                                  | 15.0 $\pm$ 2.32  | t <sub>9</sub> =-6.5, p<0.001  | Yellow            |
| 3B:1Y                     | 10 | 90           | 17.8 $\pm$ 3.92                                | 9.5 $\pm$ 2.35   | t <sub>9</sub> =3.07, p=0.013  | Blue              |
|                           |    | Blue/Yellow  | 21.7 $\pm$ 3.47                                | 5.6 $\pm$ 1.56   | Z=-2.83, p=0.005               | Blue              |
|                           |    | Yellow/Blue  | 14.1 $\pm$ 4.44                                | 9.3 $\pm$ 1.78   | t <sub>8</sub> =1.46, p>0.05   | No                |
| 1Y:3B                     | 10 | 90           | 11.7 $\pm$ 2.39                                | 4.8 $\pm$ 1.31   | t <sub>9</sub> =4.51, p=0.001  | Blue              |
|                           |    | Blue/Yellow  | 9.8 $\pm$ 2.68                                 | 8.8 $\pm$ 2.44   | Z=-0.05, p>0.05                | No                |
|                           |    | Yellow/Blue  | 18.0 $\pm$ 2.76                                | 4.7 $\pm$ 0.61   | t <sub>9</sub> =5.64, p<0.001  | Blue              |

N = number of bees in each treatment.

Test pattern numbers refer to the degree of rotation of the training stimulus.

Paired tests give the results from t-tests when data met assumptions of normality, and Wilcoxon tests if assumptions were violated.

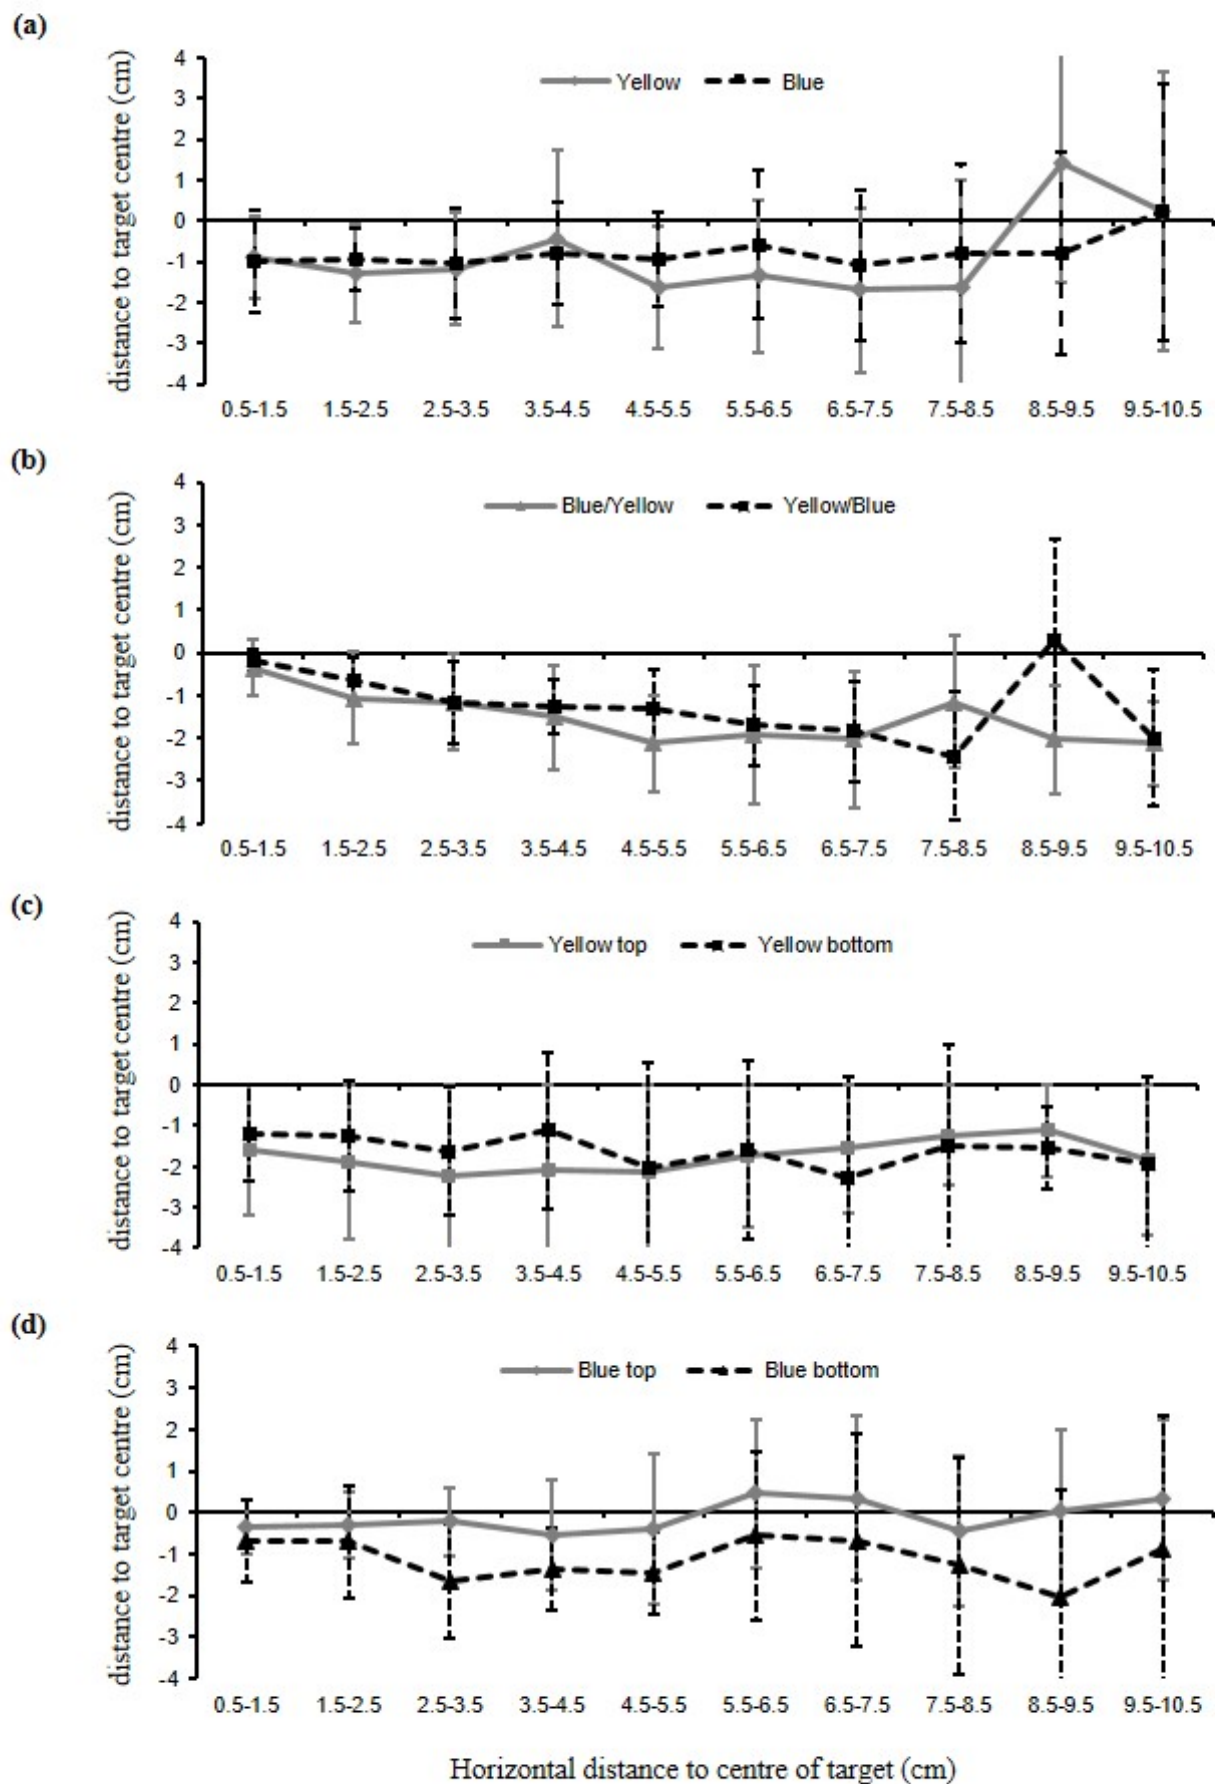

**Figure S1.** The mean approach height of bees trained to vertical colour patterns (8cm diameter) with a sucrose reward at the centre. Data shown are for the last rewarded training flight prior to tests. (a) Single-coloured blue or yellow discs (n=10 bees for both treatments); (b) bicolour discs with a central contrast line, with a blue top and yellow bottom (n=11), and vice versa (n=12); (c) bicolour patterns with an off-centre contrast line, with yellow in the top or bottom 6cm (n=10); (d) bicoloured patterns with an off-centre contrast line, with blue in the top or bottom 6cm (n=10). X-axis depicts horizontal distance and Y-axis vertical distance to the target plane. Error bars show standard deviation from the mean.
